# Supplementary material for: Copper Homeostasis in Salmonella Is Atypical and Copper-CueP Is a Major Periplasmic Metal Complex
Source: PubMed Central journal article supplement — J Biol Chem. 2010 Jun 9;285(33):25259–68. doi: 10.1074/jbc.M110.145953 (PMC2919089; doi:10.1074/jbc.m110.145953), 2010-06-09

**Supplementary Fig. 1.** Correlation between the concentration of copper in p1 (*blue*) and the abundance of individual proteins quantified following SDS PAGE by scanning gels and integrating the areas under peaks. Proteins 19 (subsequently CueP) and 22 (*red*) are the best correlating proteins in all statistical analyses. Principal component analyses using components 1 and 2 (A), 1 and 3 (B) and 2 and 3 (C) are shown. Principal component analysis using all three components is shown in Fig. 3D.

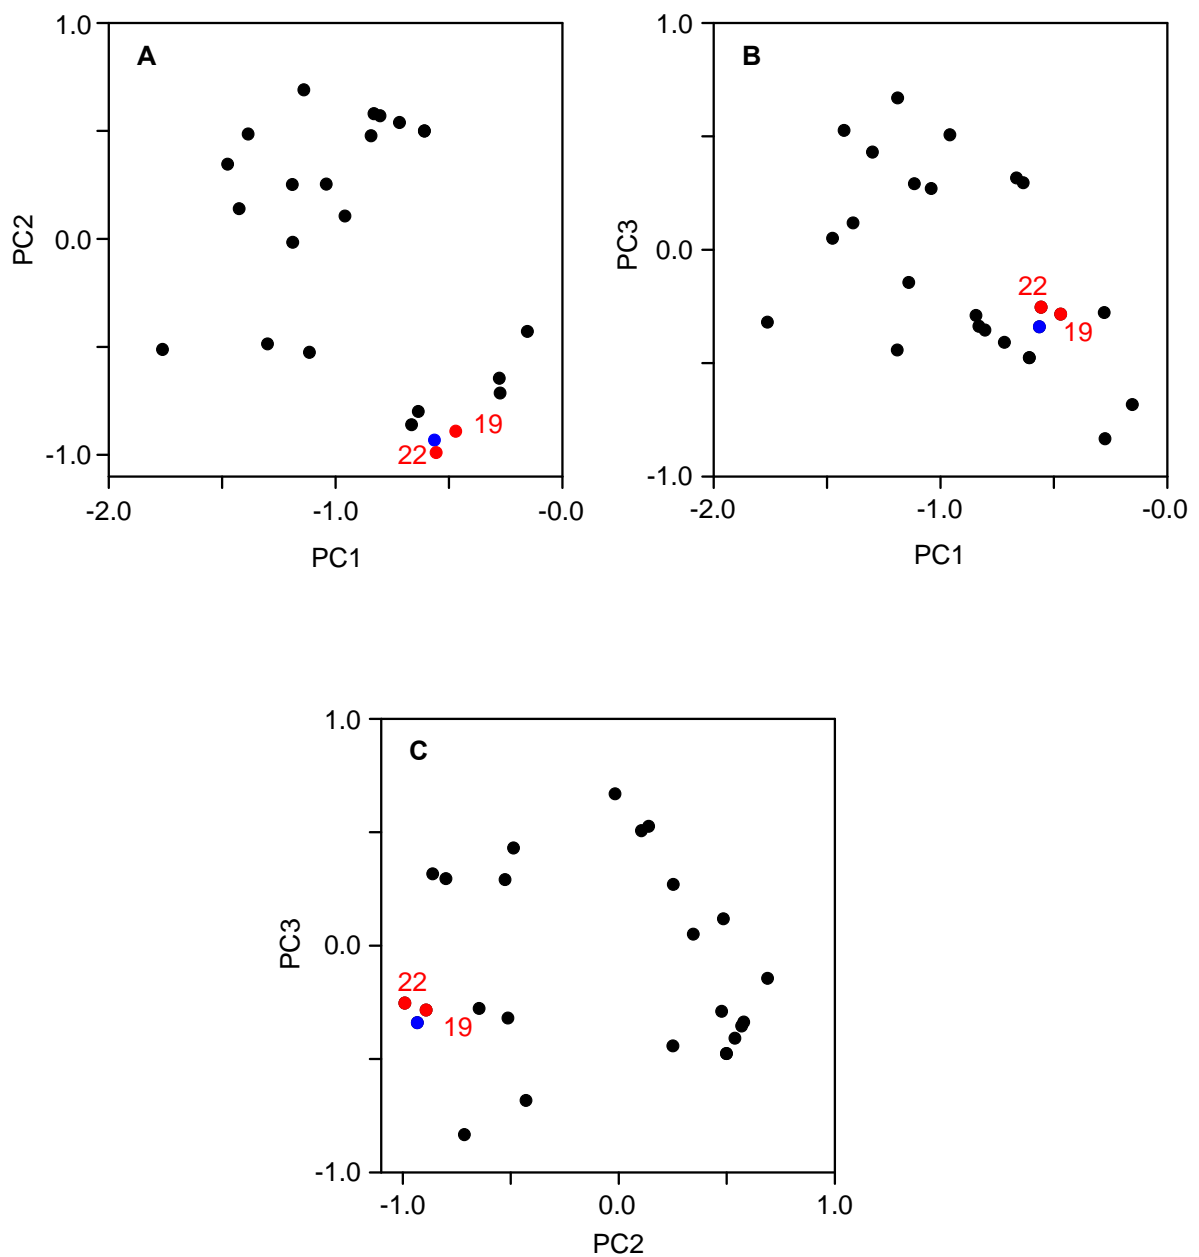

**Supplementary Fig. 2. The distribution of protein bound periplasmic copper in *S. Typhimurium*  $\Delta cueP$ .** Periplasmic extracts were resolved by two-dimensional anion exchange (*pI*) into 1ml fractions and size exclusion (*M<sub>r</sub>*) chromatography into 0.5 ml fractions and analyzed for metals by inductively coupled plasma-mass spectrometry; the full profile for copper is shown.

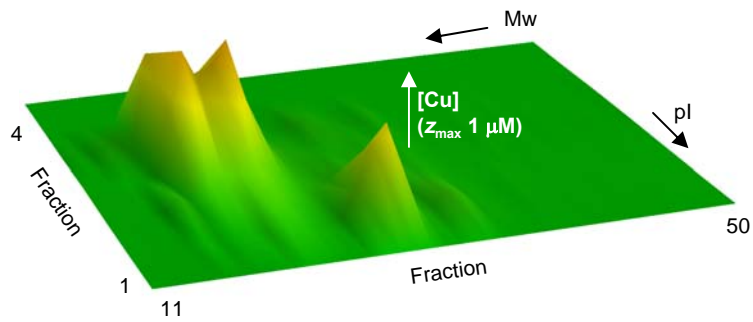

**Supplementary Fig. 3. A mutant lacking CueP has an increased copper load.** Copper contents of wild-type *S. Typhimurium* (*WT*) and  $\Delta$ *cueP* grown in M9 minimal medium in the presence of 25  $\mu$ M added copper. Metal contents are shown as atoms cell<sup>-1</sup> (*black*) or atoms mg<sup>-1</sup> cellular protein (*gray*).

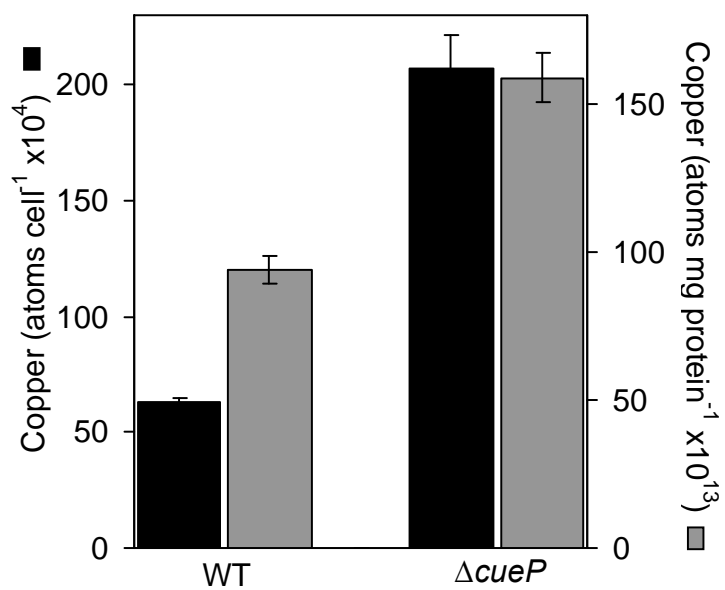

Supplement: supp_M110.145953_jbc.M110.145953-1.pdf [file supp_M110.145953_jbc.M110.145953-1.pdf]
